# Supplementary material for: A Scoping Review of Patient Support Program Services Across Diverse Settings and Disease Areas Described from a People-Centered Perspective
Source: Research Square preprint supplement (doi:10.21203/rs.3.rs-1447984/v1), 2022-04-19
Supplement: Supplementary file 1 [file 1650df11dc640de0e8194c93.xlsx]

## Sheet: Sheet1
Journal: The Patient - Patient-Centered Outcomes Research	Article Title: A Scoping Review of Patient Support Program Services Across Diverse Settings and Disease Areas Described from a People-Centered Perspective	Authors: Angela Riveroll 1,2*, Patricia Charlton3, Evelyn Pyper4, Ketlie MacPhail5, Brenda Fisher4, Christina Beck3 and William Montelpare1,3*	Corresponding Authors: Angela Riveroll (Department of Applied Human Sciences, University of Prince Edward Island anriveroll@upei.ca and William Montelpare wmontelpare@upei.ca (Department of Applied Human Sciences, University of Prince Edward Island)
Service Sub themes Identified in PSPs and Articles Divided by Disease Category
Category (Services/Disease)	Immunology			Cardiology, Metabolism, & Endocrinology			Psychology/Mental Health & Addictions			Neurology & Central Nervous System			Infectious Diseases & Vaccines			Oncology			Respirology			Musculoskeletal & Osteology			Nephrology, Renal & Urology			Various
	Reference Numbers	Number of papers	Number of programs	Reference Numbers	Number of papers	Number of programs	Reference Numbers	Number of papers	Number of programs	Reference Numbers	Number of papers	Number of programs	Reference Numbers	Number of papers	Number of programs	Reference Numbers	Number of papers	Number of programs	Reference Numbers	Number of papers	Number of programs	Reference Numbers	Number of papers	Number of programs	Reference Numbers	Number of papers	Number of Programs	Reference Numbers	Number of papers	Number of programs
	ID									ID			ID			ID			ID			ID			ID			ID
Empowerment & Self-management
Patient Counselling	(79/80/81), (27/28/29/30/31/32), 45, 64,	11	4	(82/83), 69, (61/84), 70, 74, 66	8	6	85, 37, 50, 86, 42	5	5	(43/87), 58, (72/88)	5	3	35, 68, 38 , 65, 44, 53, 33	7	7	89	1	1	62	1	1	56	1	1				59	1	1
Support for Caregivers/Family Members							(48/49), 73	3	2																			59	1	1
Patient Training	90, (27/28/29/30/31/32), 64	8	3	(82/83), 69, 66	4	3	(48/49)	2	1	(76/77/78), (72/88), 58	6	3	44, 53	2	2	41	1	1	62	1	1	75	1	1				59	1	1
Patient Education	91, (79/80/81), (27/28/29/30/31/32), 92, 45, 64, 71	14	7	(82/83), 69, (61/84), 93, 70, 74, 66, 36, 46	11	9	94, 37, 86	3	3	(76/77/78), 58, (72/88)	6	3	68, 38	2	2	54, 89, 95, 60, 52	5	5	41, 62	2	2	56	1	1				59, 51	2	2
Self-management Incentives for Engagement				74, 36	2	2							68	1	1							75	1	1
Self-management supplies, devices, aids, tools (including decision support) and apps	(27/28/29/30/31/32), 45	7	2	(82/83), 74	3	2	37, 42	2	2	(76/77/78), (43/87), (72/88)	7	3	44, 53	2	2	54	1	1	41	1	1
Patient/Carer Experience Measurement				36	1	1	73	1	1				44	1	1	52	1	1	41	1
Medication Adherence Support*	91, (27/28/29/30/31/32)	7	2	70	1	1
Access & Equity
Social Support Services													33	1	1
health care Provider Services	(79/80/81), 90,(27/28/29/30/31/32), 81, 55, 45, 64, 71	15	8	69, (82/83), (61/84), 93, 70, 74, 66, 36, 57, 46	12	10	94, 85, 34, (48/49), 73, 37, 50, 86, 42	10	9	(76/77/78), (43/87), 58, (72/88), 96	9	5	35, 68, 38, 65, 44, 53, 47, 67, 33	9	9	40, 54, 89, 60, 52	5	5	39, 41, 62, 63	4	4	75, 56	2	2	55	1	1	59, 51	2	2
Patient Support Program Awareness				36	1	1
Navigation or Referrals to Resources or Programs	(79/80/81), 64	4	2	(61/84), 36	3	2	85, 34, 73, 42	4	4				35, 68, 38, 65, 53, 89	6	6	60	1	1	62	1	1							59	1	1
Financial Services for Medication Access	91, (27/28/29/30/31/32), 92, 45	9	4	(82/83), 74	3	2	34	1	1	58	1	1	35	1	1	54	1	1	39	1	1
Logistics Services	90, (27/28/29/30/31/32), 92, 45	9	4	(82/83)	2	1	94, 85, 34, (48/49)	5	4	(76/77/78), 96	4	2	35, 38, 47, 53, 33	5	5	40, 54, 89	3	3	41	1	1	75, 56	2	2	55	1	1	59, 51	2	2
Information Technology Systems and Services,				(82/83)	2	1	42	1	1	(43/87)	2	1	44, 53, 67	3	3	54, 95	2	2	41, 63	2	2				55	1	1
Culturally Relevant/Accessibility Services	45	1	1	46	1	1							47	1	1				39	1	1
Health Services
Screening & Assessment	71	1	1	(82/83), (61/84), 93, 70	6	4	(48/49), 50, 86, 42	5	4				35, 38, 65, 44, 33	5	5	60, 52	2	2	41, 63	2	2				55	1	1	59, 51	2	2
Care Coordination and Communication for CC	(79/80/81), 45, 71	5	3	699, (61/84), 93, 74, 66	6	5	94, 85, 34, (48/49), 73	6	5	(76/77/78), (43/87)	5	2	35, 68, 38	3	3	89, 52	2	2	41, 63	2	2							59, 51	2	2
Follow up	92, 45, 64	3	3	69, 70, 57	3	3	85, 34, 37	3	3	(76/77/78)	3	1	38, 65, 44, 53	4	4	54, 60, 52	3	3				56	1	1	55	1	1	59, 51	2	2
Reminders	(79/80/81), (27/28/29/30/31/32), 45, 64	11	4	(82/83), 57	3	2	34, 37	2	2	(43/87), (72/88), 58	5	3	35, 38, 44, 53	4	4	95	1	1	41, 63	2	2	75, 56	2	2
Care plans	71	1	1	(61/84), 36	3	1	(48/49)	2	1	58	1	1	33	1	1	89, 60	2	2										59	1	1
Monitoring				(82/83), 36	3	2	94, 85, (48/49)	4	3	(43/87)	2	1	68, 44, 53, 67	4	4	40, 52	2	2	62, 63	2	2				55	1	1
Medical, Clinical & Pharmacy	27, 92, 64	3	3	(82/83), 93, 70, 66, 36, 57	7	6	94, 50	2	2	(76/77/78)	3	1	38, 65, 47, 53, 33	5	5	40, 52	2	2	39, 41, 62, 63	4	4							51	1	1
Laboratory	64	1	1										35, 38, 65, 44	4	4	40	1	1
Quality Assurance & Safety Systems				66, 36, 46	3	3	73	1	1	(43/87)	2	1	67	1	1				62, 63	2	2							59	1	1
Support for health care Providers and case managers				(61/84), 93, 70, 36	5	4	94, 73, 37	3	3	(43/87)	2	1	35, 68, 44, 67, 33	5	5	89, 95	2	2	62, 63	2	2
