# Supplementary material for: A Scoping Review of Patient Support Program Services Across Diverse Settings and Disease Areas Described from a People-Centered Perspective
Source: Research Square preprint supplement (doi:10.21203/rs.3.rs-1447984/v1), 2022-04-19
Supplement: Supplementary file 2 [file 879db714e6b24f3837248df4.xlsx]

## Sheet: Sheet1
Journal: The Patient - Patient-Centered Outcomes Research	Article Title: A Scoping Review of Patient Support Program Services Across Diverse Settings and Disease Areas Described from a People-Centered Perspective	Authors: Angela Riveroll 1,2*, Patricia Charlton3, Evelyn Pyper4, Ketlie MacPhail5, Brenda Fisher4, Christina Beck3 and William Montelpare1,3*	Corresponding Authors: Angela Riveroll (Department of Applied Human Sciences, University of Prince Edward Island anriveroll@upei.ca and William Montelpare wmontelpare@upei.ca (Department of Applied Human Sciences, University of Prince Edward Island)
Table of Clinical, Humanistic and Economic Outcome Measure Indicators, Catergorized by Disease Indication
Outcomes	Measured Indicators by Disease Category (number of articles that included indicated outcome type/total numbers of articles in the disease category, percentage of articles that included the outcome type indicated)
CLINICAL	Immunology (13/15, 86.7%):
	persistence, adherence, discontinuation of treatment, prescription abandonment, occurrence of a second refill, disease remission (Harvey Bradshaw Index), treatment-initiation abandonment, disease state (Bath Ankylosing Spondylitis Disease Activity Index [BASDAI] score), treatment effectiveness (Minimally Clinically Important Difference based on Health Assessment Questionnaire Disability Index, 28…
	Oncology(4/6, 66.7%):
	duration of treatment and reasons for treatment discontinuation, medication adherence refusal, persistence and predictors of persistence
	Central Nervous System (8/9, 88.9%):
	proportion of injections administered, proportion of weeks with treatment schedule correctly followed, self-assessed adherence, cognitive outcomes, adherence, discontinuation, persistence
	Cardiology and Metabolism (11/12, 91.7%):
	HbA1c, fasting plasma glucose, postprandial blood glucose level, blood pressure, cholesterol, triglycerides, HDL, LDL, adherence, persistence, number of refills, days on therapy, Body Mass Index (BMI), death, nutritional risk, cognitive functioning, depression, percentages of patients who received at least once-yearly monitoring of A1c, HDL-C, LDL-C, and medical attention for nephropathy, which i…
	Mental Health & Addictions (10/10, 100%):
	adherence, mean daily dosage for antipsychotics and benzodiazepines, number of patients treated with high and very high doses, number of patients taking antipsychotic polytherapy, medication, persistence, adherence, symptom severity, level of antipsychotic response, symptomatic status, medication discontinuation, relapse, compliance, Addiction Severity Index (medical, psychiatric, alcohol and dru…
	Infectious Diseases & Vaccines (8/9, 88.9%):
	program enrollment and therapy initiation, proportion of time spent virally suppressed, quarterly viral load assays, receipt of the first dose of Hepatitis A Virus - Hepatitis B Virus vaccine and adherence to an initial appointment with a hepatitis C health care provider, virological re-suppression ( defined as achieving a VL ≤400 copies/ml after having two consecutive VL measurements ≥1 000 copi…
	Osteology (2/2, 100% ):
	adherence and persistence
	Renal & Urology:
	na
	Other (1/2, 50%):
	Medication appropriateness
	Respirology (1/4, 25%):
	asthma control, forced expiratory volume in 1 s, access to medication, medication adjustments, medication adherence using medication possession ratio (MPR)
HUMANISTIC	Immunology (4/15, 26.7%):
	patient perceptions and experiences, 28-question survey on demographics, disease/treatment characteristics, health rating, lifestyle, employment, and perception of intravenous infusions and the BioAdvance program, work productivity, compliance, treatment satisfaction, beliefs about medicine, patient activation, generic health related quality of life, social participation and self-management skills
	Oncology (3/6, 50%):
	perceptions of patient centredness, patient satisfaction with patient support service, overall patient satisfaction with the nursing intervention
	CNS (5/9, 55.6%):
	patient-reported outcomes (fatigue, depression and quality of life), patient experience, adverse events (patient safety - pharmacovigilance), treatment satisfaction and disability status, patient behaviours and experiences
	Cardio and Metabolic (6/12, 50%):
	healthy diet status, physical activity, problem solving and reducing risks (measured by a self‐ care behavior scale), diabetes knowledge, self-management, health behaviours, functional capacity, health-related quality of life, fatigue, care satisfaction, falls, patient satisfaction at sites of delivery (with service, access comfort and usefulness), mean knowledge score, self-management practices …
	MH & A (6/10, 60%):
	social performance, social functioning, quality of life, patient satisfaction, adverse events which are raised through the interactions with the Carers, Addiction Severity Index: social functioning, employment, legal issues, modified to include readiness to change chemical dependence-related behaviors, self-esteem, knowledge, illness perception, engagement in smoking cessation
	Infectious Disease & Vaccines (1/9, 11.1%):
	safety and patient satisfaction
	Osteology (0/2, 0%):
	na
	Renal and Urology (0/1, 0%):
	na
	Other (1/2, 50%):
	self-efficacy with self-care/management, patient satisfaction
	Respirology (1/4, 25%):
	open-ended interviews to capture patients’ experiences and perceptions of TEAMS, to explore acceptability and perceived impact
ECONOMIC	Immunology (4/5, 26.7%):
	hospitalization rates, health care costs, (medical, drug, and total cost = medical and drug cost), all-cause hospitalization and total health care costs (both medical and pharmacy costs)
	Oncology (2/6, 33.3%):
	drug costs, number of ER visits, number of inpatient days (IPDs), IPAs
	CNS (2/9, 22.2%):
	health-economic outcomes, hospitalization rate
	Cardio and Metabolic (5/12, 41.7%):
	all-cause and diabetes-related health care resource utilization and direct costs,health care utilization (e.g. numbers of medical ambulatory consultations, days of medication prescribed and medical expenses for one year), time to first unplanned readmission, estimation of the cost-utility ratio of the case management intervention, patient copayments (i.e., net plan cost) per patient per year (PPP…
	Mental Health & Addictions (5/10, 50%):
	types of other services utilized, patient cost share for long-acting injectable aripiprazole, hospitalization rates, rehospitalization, Treatment Services Review to assess utilization of health, care, social, legal, and other public and private services, informal admission to a mental health hospital, compulsory admission to a mental health hospital (involving a Mental Health Act assessment), the…
	Infectious Disease & Vaccination (2/9, 22.2%):
	Costs of program, total cost of the intervention (i.e. health provider time/cost; mobile phones, and plans)
	Osteology (0/2, 0%):
	NA
	Renal and Urology (1/1, 100%):
	Overall, six cost figures (costs of general practitioner out-patient care visits, costs of medical specialist out-patient care visits, costs of scheduled in-hospital care, costs of unscheduled in-hospital care, costs of ambulatory visits at the outpatient department and total costs of care)
	Other (1/2, 50%):
	service utilization
	Respirology (1/4, 25%):
	emergency department, (ED) visits, hospitalisations
Clinical Outcomes Are Categorized by Disease Indication
